# Supplementary material for: The Spt10 GNAT Superfamily Protein Modulates Development, Cell Cycle Progression and Virulence in the Fungal Insect Pathogen, Beauveria bassiana
Source: MDPI journal article supplement (doi:10.3390/jof7110905), 2021-10-26
Supplement: s1 [file s1]

## Supporting Information

### **The Spt10 GNAT superfamily protein modulates development, cell cycle progression and virulence in the fungal insect pathogen, *Beauveria bassiana***

**Qing Cai <sup>1,2,\*</sup>, Juan-Juan Wang <sup>3</sup>, Jia-Tao Xie <sup>1</sup>, Dao-Hong Jiang <sup>1</sup>, Nemat O. Keyhani <sup>2,\*</sup>**

<sup>1</sup> State Key Laboratory of Agricultural Microbiology, College of Plant Science and Technology, Huazhong Agricultural University, Wuhan, Hubei, 430070, China

<sup>2</sup> Department of Microbiology and Cell Science, University of Florida, Bldg. 981, Museum Rd., Gainesville, FL, 32611, USA

<sup>3</sup> School of Biological Science and Biotechnology, University of Jinan, Jinan, Shandong, 250022, China

.

**\* Corresponding author:** Qing Cai, Huazhong Agricultural University, Wuhan, Hubei, 430070, China. Phone and fax: (+)

86-027-87280487. E-mail: [caiqing@mail.hzau.edu.cn](mailto:caiqing@mail.hzau.edu.cn); Nemat O. Keyhani, University of Florida, Gainesville, Florida, 32611, USA. E-mail: [keyhani@ufl.edu](mailto:keyhani@ufl.edu).

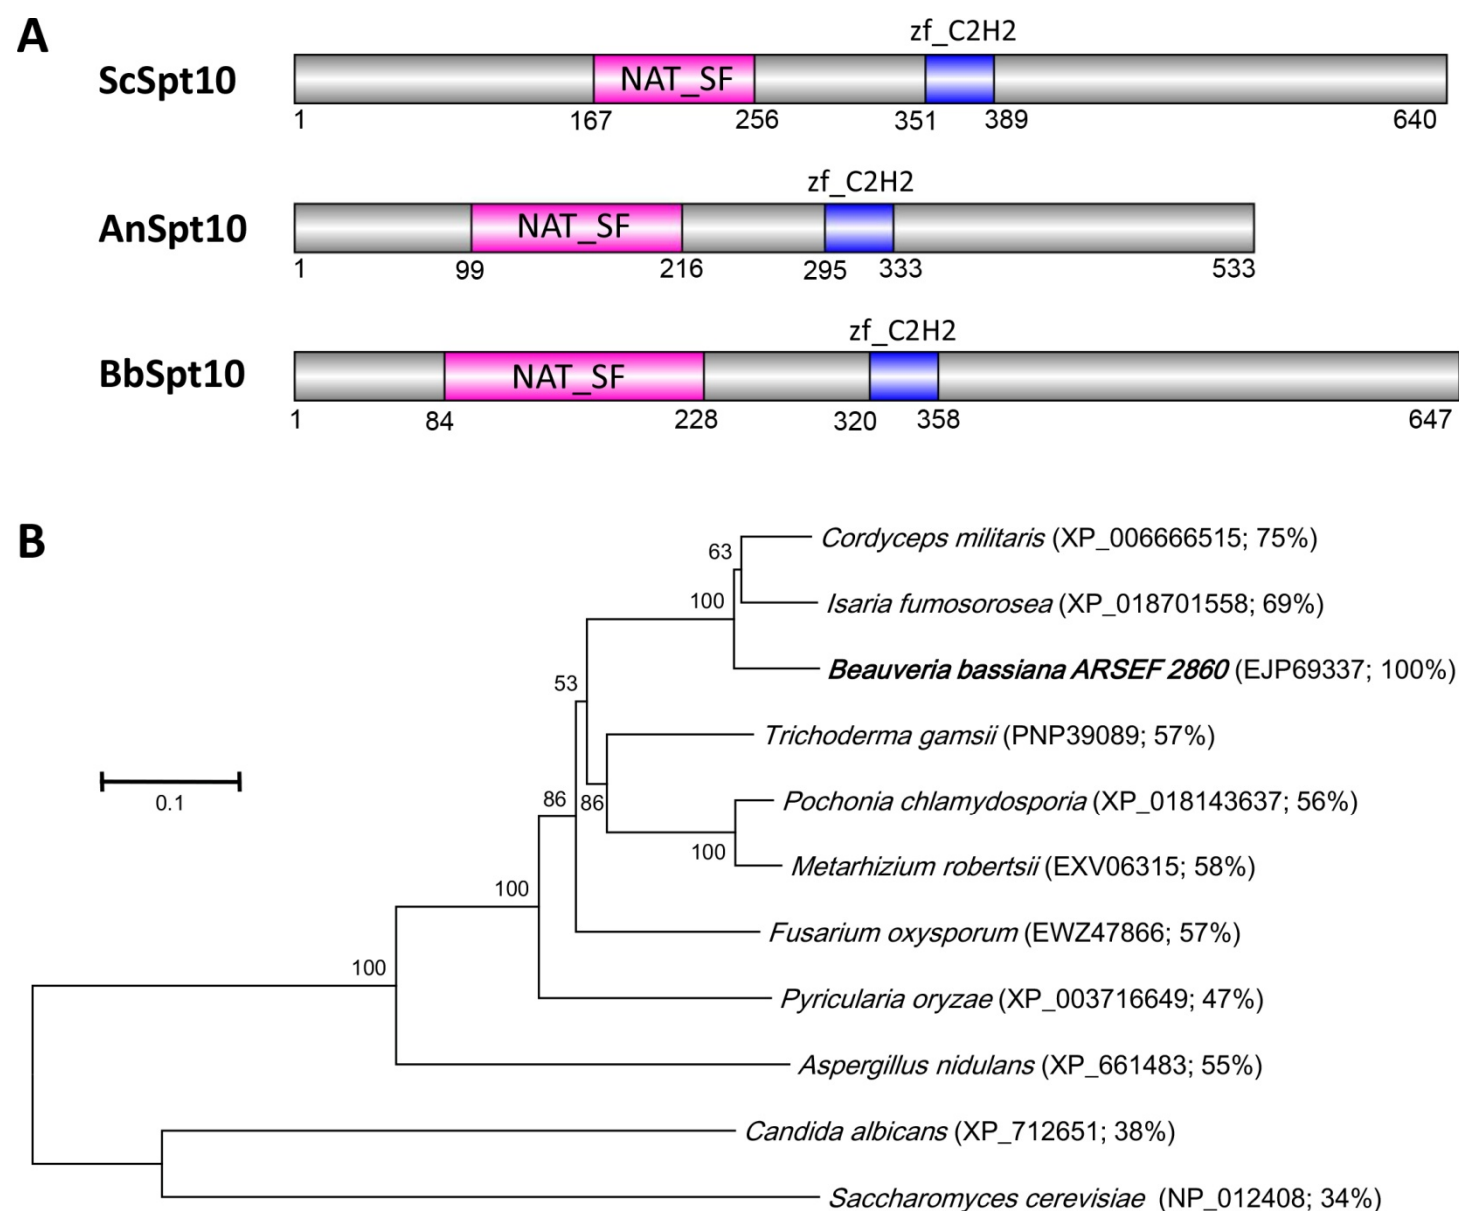

**Figure S1.** Bioinformatic properties of fungal Spt10 homologues. **(A)** Sequence features of Spt10 homologs found in *Beauveria bassiana* (Bb), *Saccharomyces cerevisiae* (Sc), and *Aspergillus nidulans* (An). The domain of each protein was predicted at <https://blast.ncbi.nlm.nih.gov/Blast.cgi>. **(B)** Phylogenetic relationship of *B. bassiana* Spt10 with the homologs found in other representative fungi. A neighbor-joining method in MEGA7 at <http://www.megasoftware.net> was used in the phylogenetic analysis. Each fungal name is followed by the NCBI accession code of each protein and its sequence identity (%) to *B. bassiana* Spt10 in parentheses. Poisson model was used with 1000 bootstrap replications in uniform rates. Scale bar: branch length proportional to genetic distance assessed with the neighbor-joining method.

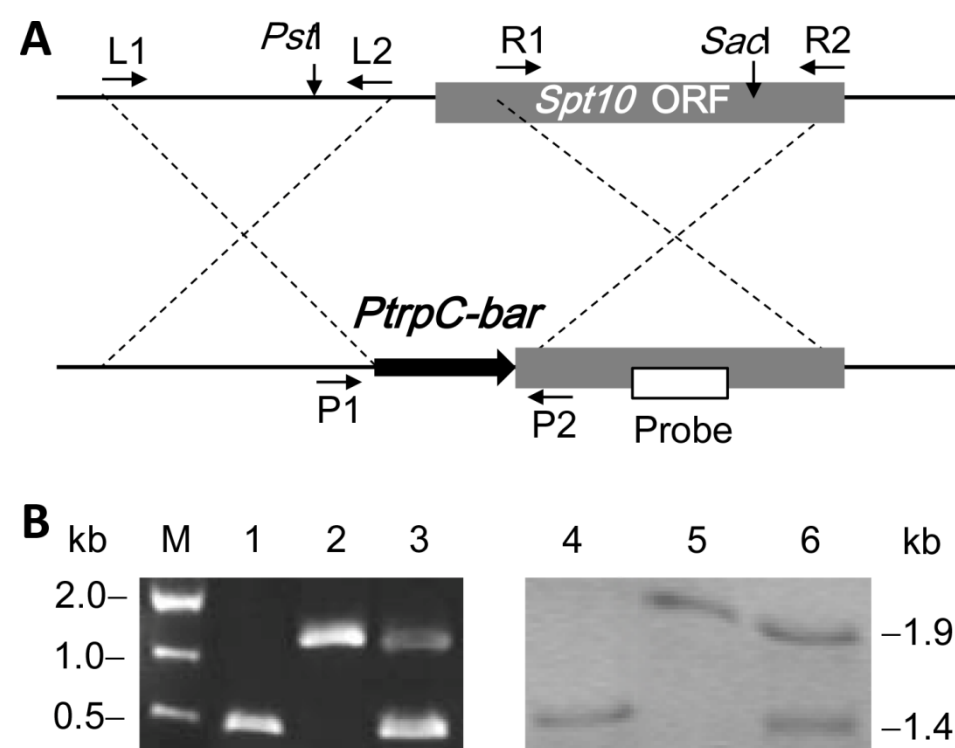

**Figure S2.** Generation and identification of *B. bassiana* *spt10* mutants. **(A)** Schematic diagram for the strategy of *spt10* deletion. **(B)** The *spt10* mutants identified via PCR (lanes 1–3) and Southern blotting (lanes 4–6) analyses with paired primers and amplified probe (Table S1). Lanes 1 and 4: wild-type. Lanes 2 and 5:  $\Delta spt10$  mutant. Lanes 3 and 6:  $\Delta spt10::spt10$  mutant. Genomic DNAs were digested with *Pst*I/*Sac*I at the marked sites for the Southern blotting hybridization of *spt10*.

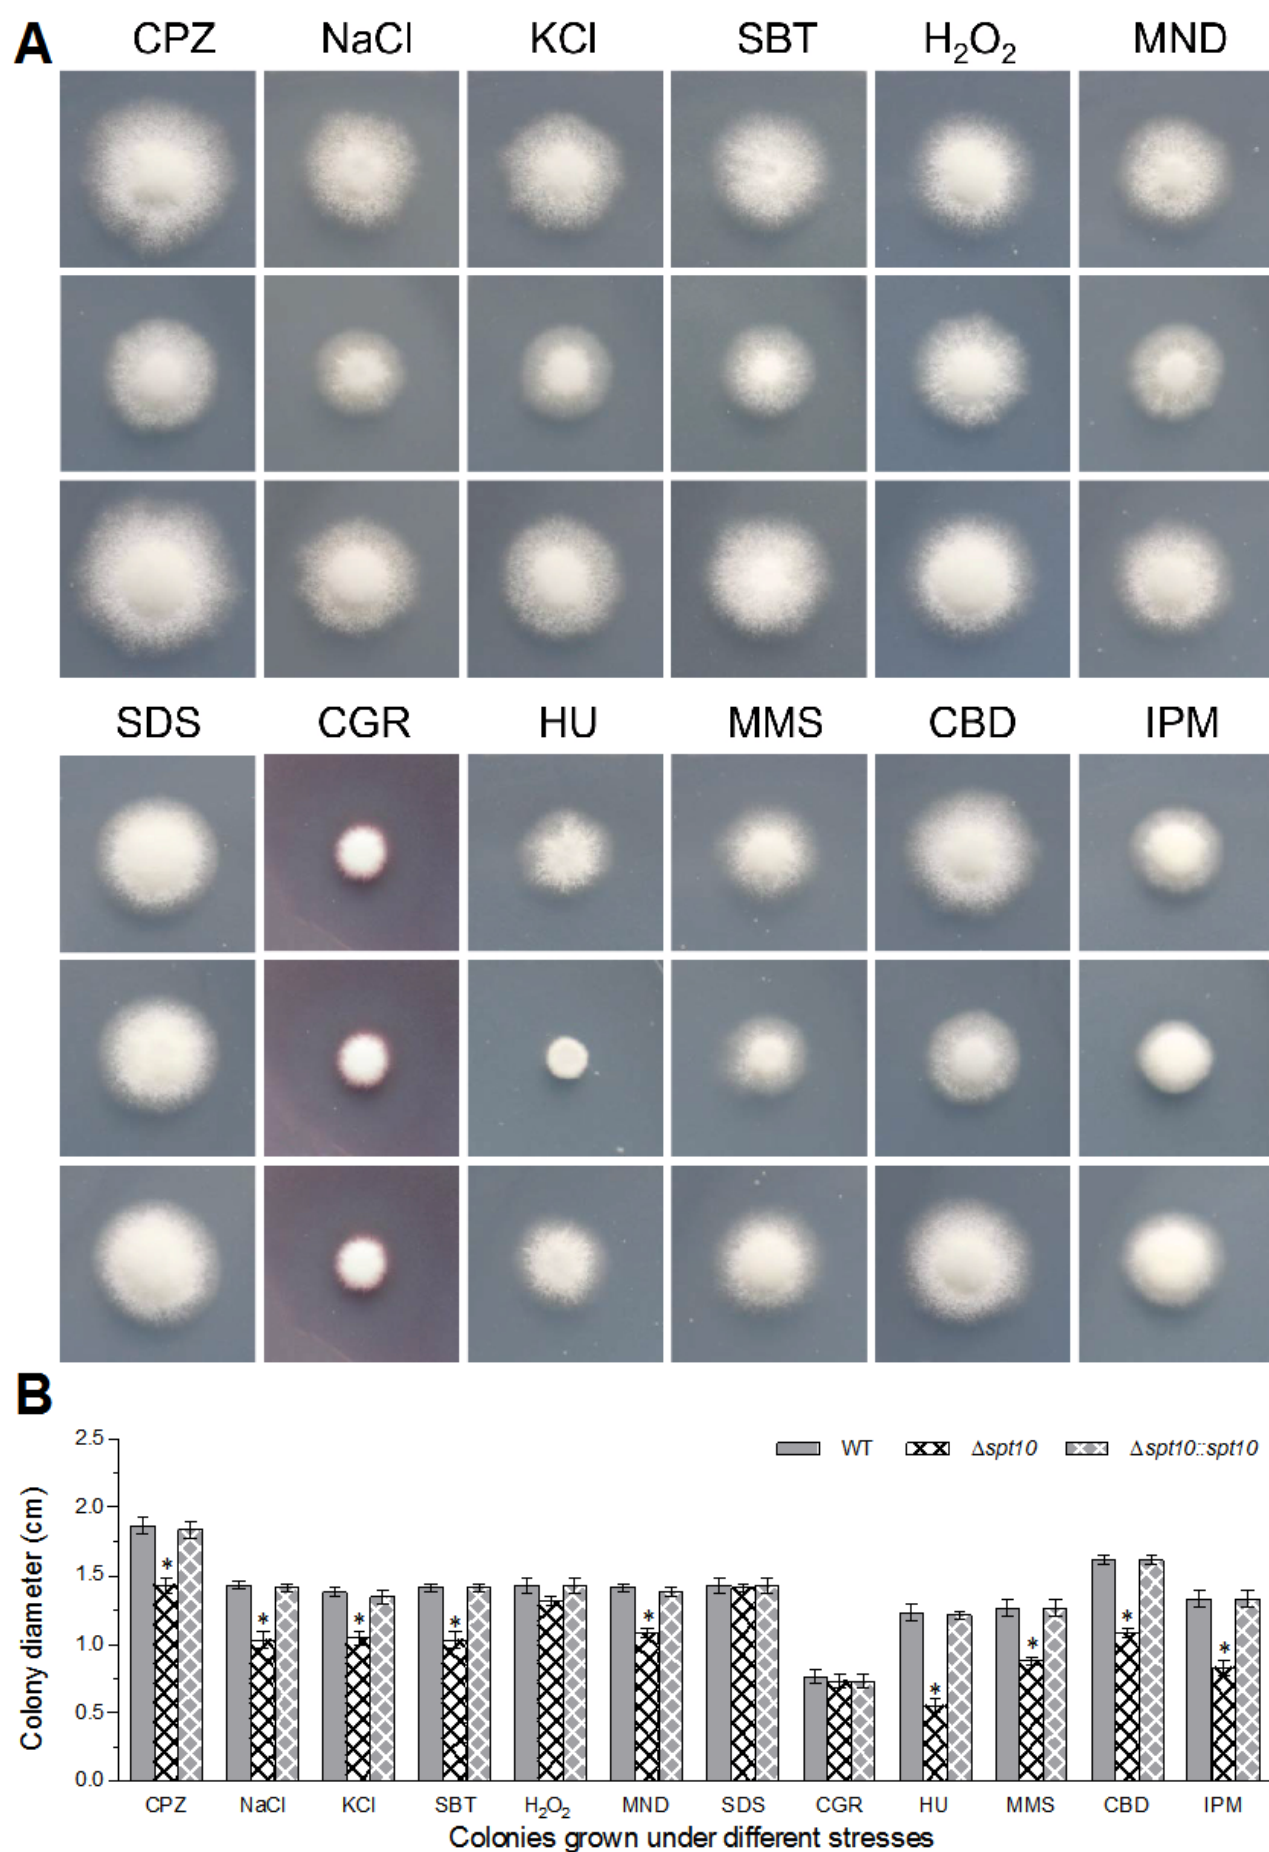

**Figure S3.** Multiple stress responses of *B. bassiana* in absence of *Spt10*. (**A**, **B**) Images and colony diameters of fungal colonies grown at 25°C for 8 d on CZA supplemented with NaCl (0.4 M), KCl (0.4 M), sorbitol (SBT; 0.6 M), H<sub>2</sub>O<sub>2</sub> (2 mM), menadione (MND; 0.02 mM), SDS (0.1 mg/ml), congo red (CGR; 10 μg/ml), hydroxyurea (HU; 10mM), methyl methanesulfonate (MMS, 0.05%), carbendazim (CBD, 5 μg ml<sup>-1</sup>) and ipodione metabolite (IPM, 10 μg ml<sup>-1</sup>). The asteristed bar in each three-bar group differ significantly from those unmarked (Tukey's HSD,  $p < 0.05$ ). Error bars: SD of the mean from three replicates.

**Table S1.** Paired primers designed for manipulation of *spt10* and identification of its mutants in *B. bassiana*.

| Primers     | Paired sequences (5'-3')*                                                                                          | Purpose                                    |
|-------------|--------------------------------------------------------------------------------------------------------------------|--------------------------------------------|
| Spt10-F/R   | ACCTTCAAACCCGGGGATCCATGCTGCCGCGTCGA/ATCTGCAGGTGCAGCGGATCCAGTCCACCCCTTGTAT                                          | Cloning <i>spt10</i> cDNA(1941 bp)         |
| Spt10up-F/R | AAAAAGAATTCCAAGACAGGCAAAGAGGATTCA / AAAAAAAGCTTCCAGCCAGTACAACACTTGCTT                                              | Cloning <i>spt10</i> 5'-end (1545 bp)      |
| Spt10dn-F/R | AAAAAACTAGTATCACCTATCTCTGCGGGCA / AAAAAAGTTAACCATCCAATCGTCCATGTCC                                                  | Cloning <i>spt10</i> 3'-end (1720 bp)      |
| Spt10fl-F/R | <u>gggg</u> ACCACTTTGTACAAGAAAGCTTCCAAGACAGGCAAAGAGG /<br><u>gggg</u> ACAAGTTTGTACAAAAAAGCAAAACATTGAGCACAAAGGAGCAA | Cloning full-length <i>spt10</i> (4219 bp) |
| pSpt10-F/R  | CGGTGTAAGTCAATACGGCAAG / CCAAAGTTTGGAAACAGTACG                                                                     | PCR detecting <i>spt10</i>                 |
| sbSpt10-F/R | GCGTCTTCAACTTGGTGT / CCGTAGTCTTGTATTATGCC                                                                          | Southern blotting <i>spt10</i> (462 bp)    |
| qSpt10-F/R  | GCTCATCACCTATCTCTG / GTAAAGGGCTCCATCATC                                                                            | qPCR detecting <i>spt10</i>                |
| q18S-F/R    | TGGTTTCTAGGACCGCCGTAA / CCTTGGCAAATGCTTTCGC                                                                        | qPCR detecting 18S RNA                     |

\* Underlined regions denote the restriction enzyme sites used for cloning *spt10* cDNA (*Bam*HI/*Bam*HI) or deleting *spt10* (*Eco*RI/*Hind*III and *Spe*I/*Hpa*I) and the fragments of gateway exchange for *Spt10* complementation.

**Table S2.** Paired primers used for transcriptional profiling of potential Spt10-targeted genes in *B. bassiana* via qPCR.

| Gene                                   | Tag loci* | Annotation                                                          | Sequences (5'-3') of paired primers               |
|----------------------------------------|-----------|---------------------------------------------------------------------|---------------------------------------------------|
| <b>Involved in asexual development</b> |           |                                                                     |                                                   |
| <i>fluG</i>                            | BBA_04942 | Developmental protein FluG                                          | CCTCCCTAGTTTGGTCGCTTTCTC / CGCTGTCGGTAATCTGCTCCTC |
| <i>flbA</i>                            | BBA_02968 | Developmental regulator FlbA                                        | CCAATCCACTCGCCGCTCTC / CGGAGGAAAGAGAATCGGTAGAGG   |
| <i>flbB</i>                            | BBA_06988 | bZIP transcription factor FlbB                                      | GCACTGACACGCCGACAAGAGC / CCGCCGCCGAAGCCTGTTG      |
| <i>flbC</i>                            | BBA_03181 | C <sub>2</sub> H <sub>2</sub> conidiation transcription factor FlbC | TCCATCTCCAACCTTGCTGGGTCTC / GCGGGCGTAGGCGGAAGG    |
| <i>flbD</i>                            | BBA_07259 | MYB conidiophore development protein FlbD                           | CGGCAAGCGATGGGCAGAGATTG/ CGAGCAAGGTGACGGTAGAGGTG  |
| <i>flbE</i>                            | BBA_01716 | Conidiophore development protein FlbE                               | CAGACGATGAGACAGAGA / GGGCTTTATATGCGAGTAG          |
| <i>brlA</i>                            | BBA_07544 | C <sub>2</sub> H <sub>2</sub> conidiation transcription factor BrlA | GACCAGTTCAACAGACAAG / CAGTAATCTTCGTGCTTCTC        |
| <i>abaA</i>                            | BBA_00300 | Conidiation factor AbaA                                             | GCAAGTCTCCAGCCATAT / CTCCTCTTCGTCATAGTAGTC        |
| <i>wetA</i>                            | BBA_06126 | Conidial maturation factor WetA                                     | CGCAGACGAATTTGACTT / GCTGGTGGTTGAATACAT           |
| <i>vosA</i>                            | BBA_01023 | Velvet protein VosA                                                 | GGACAGACGAGTGATTGA / GGCATATACGACGCATCT           |
| <b>Involved in hyphal septation</b>    |           |                                                                     |                                                   |
| <i>apsA</i>                            | BBA_05547 | Cell division/GTP binding protein ApsA                              | CTCTGCTCTGCTTCATAG / TTCTCGGTACGGTAGTTC           |
| <i>apsB</i>                            | BBA_06894 | Cell division/GTP binding protein ApsB                              | TTACCGACAACATTGAAC / GGATGAAGAAGACACAAG           |
| <i>apsC</i>                            | BBA_04748 | Cell division control protein 12 ApsC                               | GGAGAAGTTCTTCAAGGT / AGGAGTCACGATTGTTAA           |
| <i>chsA</i>                            | BBA_03236 | Class 2 chitin synthetase ChsA                                      | GTGTCTTACTGATTGCTA / ATAATGATGGCGTAGATG           |
| <i>chsB</i>                            | BBA_04667 | Chitin synthetase 3a ChsB                                           | CTCTGCCAATGTCACCAAG / TCAATGTCTTCCTGCTCCTT        |
| <i>chsC</i>                            | BBA_03590 | Chitin synthetase 1 ChsC                                            | CGATCTGAACCAGCACAA / ATGACGGAGACGATGAGT           |
| <i>bud3</i>                            | BBA_03175 | RhoGEF domain-containing protein Bud3                               | GATAATCCTATAATACGACTC / GTAGACATCATTGACAAG        |
| <i>bud4</i>                            | BBA_01075 | GTP binding protein Bud4                                            | GCGTCATCATCACCAGAA / TAATCTCATCATCCTCATCATACA     |
| <i>rho4</i>                            | BBA_03155 | Ras family protein Rho4                                             | CACATACTCCAAGAAGATT / AAGACGGTAGGAACATAT          |
| <i>sepH</i>                            | BBA_03315 | Cell division control protein SepH                                  | AACTGCCTCAACATCATC / TCATATACACGCCAACAAG          |

\* Gene accession codes in *B. bassiana* genome under the NCBI accession NL\_ADAH00000000 (Xiao *et al.*, 2012).
